# Supplementary material for: A Positive Association of Overactivated Immunity with Metabolic Syndrome Risk and Mitigation of Its Association by a Plant-Based Diet and Physical Activity in a Large Cohort Study
Source: MDPI journal article supplement (doi:10.3390/nu13072308), 2021-07-05
Supplement: s1 [file s1]

Table S1. General characteristics and incidence of various diseases of the participants according to innate immunity status and genders

|                                  | Men                      |                          |                         |                            | Women                         |                           |                         |                           |
|----------------------------------|--------------------------|--------------------------|-------------------------|----------------------------|-------------------------------|---------------------------|-------------------------|---------------------------|
|                                  | L-WBC+L-CRP<br>(n=7,234) | H-WBC+L-CRP<br>(n=6,084) | L-WBC+H-<br>CRP (n=168) | H-WBC+H-<br>CRP (n=370)    | L-WBC+L-<br>CRP<br>(n=17,450) | H-WBC+L-<br>CRP (n=7,494) | L-WBC+H-<br>CRP (n=277) | H-WBC+H-<br>CRP (n=428)   |
| Age (years)                      | 55.1±8.3 <sup>1a</sup>   | 54.5±8.5 <sup>b</sup>    | 55.6±8.2 <sup>ab</sup>  | 55.5±8.4 <sup>ab***</sup>  | 53.1±7.6 <sup>b</sup>         | 52.4±8.1 <sup>c</sup>     | 54.5±7.8 <sup>a</sup>   | 53.6±7.9 <sup>b***</sup>  |
| Physical activity (N, Yes %)     | 4,368 (62.8)             | 3,241(54.9)              | 101(64.7)               | 185 (52.0) <sup>***</sup>  | 9,358(53.8)                   | 3,654 (49.0)              | 141 (51.1)              | 187 (43.9) <sup>***</sup> |
| Smoker (N, %)                    | 1,307 (18.8)             | 2,385 (40.4)             | 34 (21.8)               | 1,51 (42.4) <sup>***</sup> | 234 (1.35)                    | 281 (3.77)                | 1 (0.36)                | 23 (5.39) <sup>***</sup>  |
| Metabolic syndrome (N, Yes %)    | 930(13.3)                | 1311 (22.1)              | 29 (18.5)               | 105 (29.4) <sup>***</sup>  | 1,611 (9.2)                   | 1,352 (18.0)              | 54 (19.5)               | 107 (25.0) <sup>***</sup> |
| Obesity (N, %)                   | 2,634(37.7)              | 2,552 (43.0)             | 66 (42.0)               | 154 (43.1) <sup>***</sup>  | 4,351 (24.9)                  | 2,657 (35.5)              | 102 (36.8)              | 202 (47.2) <sup>***</sup> |
| Hypertension (N, %)              | 1,967(28.2)              | 2,011(33.9)              | 53 (33.8)               | 136(38.1) <sup>***</sup>   | 3,190 (18.3)                  | 1,962 (26.2)              | 80 (28.9)               | 139 (32.5) <sup>***</sup> |
| Type 2 Diabetes (N, %)           | 769 (11.0)               | 963 (16.2)               | 23 (14.7)               | 79 (22.1) <sup>***</sup>   | 953 (5.46)                    | 916 (12.2)                | 40 (14.4)               | 84 (19.6) <sup>***</sup>  |
| Cardiovascular disease (N, %)    | 421 (5.93)               | 390 (6.58)               | 7 (4.49)                | 25 (6.74)                  | 487 (2.75)                    | 245 (3.27)                | 13 (4.71)               | 16 (3.74) <sup>*</sup>    |
| Myocardial infarction (N, Yes %) | 290 (4.15)               | 278 (4.69)               | 5 (3.21)                | 15 (4.21)                  | 352 (2.02)                    | 179 (2.39)                | 9 (3.26)                | 11 (2.57)                 |
| Stroke (N, %)                    | 131 (1.10)               | 122 (2.06)               | 2 (1.28)                | 10 (2.81)                  | 135 (0.77)                    | 77 (1.03)                 | 4 (1.45)                | 5 (1.17)                  |

<sup>1</sup>Means ± standard deviations. Immunity was categorized into 4 groups: L-WBC+L-CRP, H-WBC+L-CRP, L-WBC+H-CRP, and H-WBC+H-

CRP. Their cutoffs were  $< 6.0 \times 10^9/\text{ml}$  for white blood cell counts (L-WBC) and  $< 0.5 \text{ mg/dL}$  serum CRP concentrations (L-CRP) for low levels. Their high levels were represented by H-WBC and H-CRP. N, Number.

\*\*\* Significant difference by the immunity groups in one-way ANCOVA test at  $P < 0.0001$ .

\*\*\* Significant difference among the groups in categorical variables by  $\chi^2$  test at  $P < 0.0001$ .

<sup>a,b,c</sup> Different letters indicated significant differences among the groups in the Tukey test at  $P < 0.05$ .

Supplementary Table S2. Adjusted odds ratio (ORs) and 95% confidence intervals (CIs) of high WBC or serum CRP concentrations for metabolic syndrome and various metabolic-related parameters

|                                             | High WBC ( $\geq 6.2 \times 10^9$ ;<br>n=11,363) | High CRP ( $\geq 0.5$ mg/dL;<br>n=2,018) |
|---------------------------------------------|--------------------------------------------------|------------------------------------------|
| Age (<55 years) <sup>1</sup>                | 1.105 (1.012-1.206) *                            | 1.240 (1.036-1.483) *                    |
| Gender (Female)                             | 1.051 (0.895-1.233)                              | 0.807 (0.566-1.152)                      |
| MetS (no MetS)                              | 1.490 (1.349-1.646) ***                          | 1.465 (1.232-1.742) ***                  |
| BMI (<25 kg/m <sup>2</sup> )                | 1.188 (1.095-1.290) ***                          | 1.222 (1.036-1.442) *                    |
| Waist circumferences (M: <90 cm; F: <85 cm) | 1.256 (1.148-1.374) ***                          | 1.465 (1.232-1.742) ***                  |
| Serum glucose (<126 mg/dL)                  | 1.232 (1.132-1.341) ***                          | 1.110 (0.936-1.316)                      |
| Blood HbA1c (<6.5%)                         | 1.934 (1.715-2.181) ***                          | 1.128 (0.890-1.430)                      |
| Serum total cholesterol (<230 mg/dL)        | 1.528 (1.387-1.684) ***                          | 0.868 (0.703-1.071)                      |
| Serum HDL (M: $\geq 40$ F: $\geq 50$ mg/dL) | 1.107 (1.006-1.220) *                            | 1.548 (1.288-1.861) ***                  |
| Serum LDL (<160 mg/dL)                      | 1.383 (1.231-1.553) ***                          | 1.016 (0.799-1.291)                      |
| Serum TG (<150 mg/dL)                       | 1.536 (1.413-1.671) ***                          | 0.920 (0.778-1.088)                      |
| SBP (<130 mmHg)                             | 1.113 (1.024- 1.210) *                           | 0.954 (0.804-1.132)                      |
| DBP (<90 mmHg)                              | 1.044 (0.922-1.181)                              | 1.005 (0.783-1.289)                      |
| Serum AST (<35 IU/L)                        | 1.150 (1.005-1.316) *                            | 1.599 (1.263-2.024) ***                  |
| Serum ALT (<35 IU/L)                        | 1.210 (1.088-1.346) **                           | 0.993 (0.794-1.240)                      |

WBC, white blood cell counts; CRP, serum C-reactive protein concentrations

<sup>1</sup> ( ) reference for ORs

<sup>2</sup> Adjusted ORs and 95% confidence intervals after age, gender, body mass index (BMI), residence area, education level, income, daily energy intake, physical activity, smoking and alcohol intake,

Supplemental Table S3. Factor loadings of food groups in dietary patterns identified using principle component analysis

|                                      | Korean<br>balanced diet | Plant-based diet | Western-<br>style diet | Rice-based diet |    |
|--------------------------------------|-------------------------|------------------|------------------------|-----------------|----|
| Rice                                 | -2                      | -7               | 4                      | 93              | *  |
| Grains                               | 9                       | -4               | -2                     | -93             | *  |
| Noodles                              | 2                       | 3                | 62                     | *               | 2  |
| Breads                               | -7                      | 34               | 53                     | *               | -5 |
| Cakes                                | -8                      | 32               | 30                     |                 | 6  |
| Cookies                              | 31                      | 48               | *                      | 3               | 2  |
| Beans                                | 24                      | 50               | *                      | 6               | -3 |
| Tubers                               | 50                      | *                | 2                      | -1              | -2 |
| Kimchi                               | 8                       | 44               | *                      | 15              | 5  |
| Eggs                                 | -4                      | 15               | 75                     | *               | -4 |
| Fast foods                           | 67                      | *                | 39                     | -2              | -1 |
| Green vegetables                     | 70                      | *                | 29                     | 1               | 2  |
| White vegetables                     | 74                      | *                | 29                     | -4              | 3  |
| Mushroom                             | 49                      | *                | 40                     | *               | -6 |
| Fatty fishes                         | 53                      | *                | 22                     | 12              | 0  |
| White fishes                         | 66                      | *                | 17                     | 13              | 0  |
| Crabs                                | 49                      | *                | 3                      | 19              | 1  |
| Processed meats                      | 18                      |                  | 15                     | 6               | -1 |
| Red meats                            | 46                      | *                | -7                     | 41              | *  |
| Soups                                | 16                      |                  | 4                      | 65              | *  |
| Chicken                              | 33                      |                  | -5                     | 39              | *  |
| Seaweed                              | 44                      | *                | 41                     | *               | -2 |
| Milk and its products                | 11                      |                  | 49                     | *               | 2  |
| Beverages                            | 19                      |                  | 32                     | 6               | 2  |
| Coffee                               | 10                      |                  | 0                      | 18              | 15 |
| Teas                                 | 14                      |                  | -8                     | 24              | 14 |
| Fruits                               | 19                      |                  | 47                     | *               | -6 |
| Korean fermented foods               | 50                      | *                | 0                      | 5               | 2  |
| Alcohols                             | 18                      |                  | -28                    | 16              | 6  |
| Nuts                                 | -2                      |                  | 50                     | *               | 6  |
| Variance Explained by<br>Each Factor | 3.533                   | 2.493            | 2.296                  | 1.798           |    |

Printed values are multiplied by 100 and rounded to the nearest integer.

Values greater than 0.40 are flagged by an '\*'.
